# Supplementary material for: lncRNA-CASC15 promotes osteosarcoma proliferation and metastasis by regulating epithelial-mesenchymal transition via the Wnt/β-catenin signaling pathway
Source: PubMed Central journal article supplement — Oncol Rep. 2021 Mar 24;45(5):76. doi: 10.3892/or.2021.8027 (PMC8020213; doi:10.3892/or.2021.8027), 2021-03-24
Supplement: Supplementary_Data.pdf [file Supplementary_Data.pdf]

Table SI. Primer sequences used for RT-qPCR.

| Gene             | Sequence                     |
|------------------|------------------------------|
| CASC15           |                              |
| Forward          | 5'-TCAGGTCCTCTCTCCATGCT-3'   |
| Reverse          | 5'-CACAGTTCTCCGCTGGAGTC-3'   |
| Wnt1             |                              |
| Forward          | 5'-CGATGGTGGGGTATTGTGAAC-3'  |
| Reverse          | 5'-CCGGATTTTGGCGTATCAGAC-3'  |
| $\beta$ -catenin |                              |
| Forward          | 5'-GACTTCACCTGACAGATCCAAG-3' |
| Reverse          | 5'-AGCTGAACAAGAGTCCAAG-3'    |
| E-cadherin       |                              |
| Forward          | 5'-TCCCATCAGCTGCCAGAAA-3'    |
| Reverse          | 5'-TGACTCCTGTGTTCTGTT A-3'   |
| N-cadherin       |                              |
| Forward          | 5'-GGGAAATGGAACTTGATGGCA-3'  |
| Reverse          | 5'-TGGAAAGCTTCTCACGGCAT-3'   |
| Vimentin         |                              |
| Forward          | 5'-TCCGCACATTCGAGCAAAGA-3'   |
| Reverse          | 5'-TGAGGGCTCCTAGCGGTTTA-3'   |
| Cyclin D         |                              |
| Forward          | 5'-GCTGCGAAGTGGAAACCATC-3'   |
| Reverse          | 5'-CCTCCTTCTGCACACATTTGAA-3' |
| $\beta$ -actin   |                              |
| Forward          | 5'-TCACCATGGATGATGATATCGC-3' |
| Reverse          | 5'-GGAATCCTTCTGACCCATGC-3'   |

CASC15, cancer susceptibility 15; RT-qPCR, reverse transcription polymerase chain reaction.
